# Supplementary material
Source: publisher figshare collection journal article supplement (https://frontiersin.figshare.com/ndownloader/files/30819643)
Supplement: Supplementary file [file 30819643]

# **LOX-1-expressing immature neutrophils identify critically-ill COVID-19 patients at risk of thrombotic complications**

Behazine Combadière,<sup>1,†,¥</sup> Lucille Adam,<sup>1,\*</sup> Noelline Guillou,<sup>1,\*</sup> Paul Quentric,<sup>1,2,\*</sup> Pierre Rosenbaum,<sup>1</sup> Karim Dorgham,<sup>1</sup> Olivia Bonduelle,<sup>1</sup> Christophe Parizot,<sup>1,2</sup> Delphine Sauce,<sup>1</sup> Julien Mayaux,<sup>3</sup> Charles-Edouard Luyt,<sup>4,5</sup> Alexandre Boissonnas,<sup>1</sup> Zahir Amoura,<sup>6</sup> Valérie Pourcher,<sup>7</sup> Makoto Miyara,<sup>1,2</sup> Guy Gorochov,<sup>1, 2,†</sup> Amélie Guihot,<sup>1,2,†</sup> and Christophe Combadière<sup>1,†,¥</sup>

***Supplementary figures***

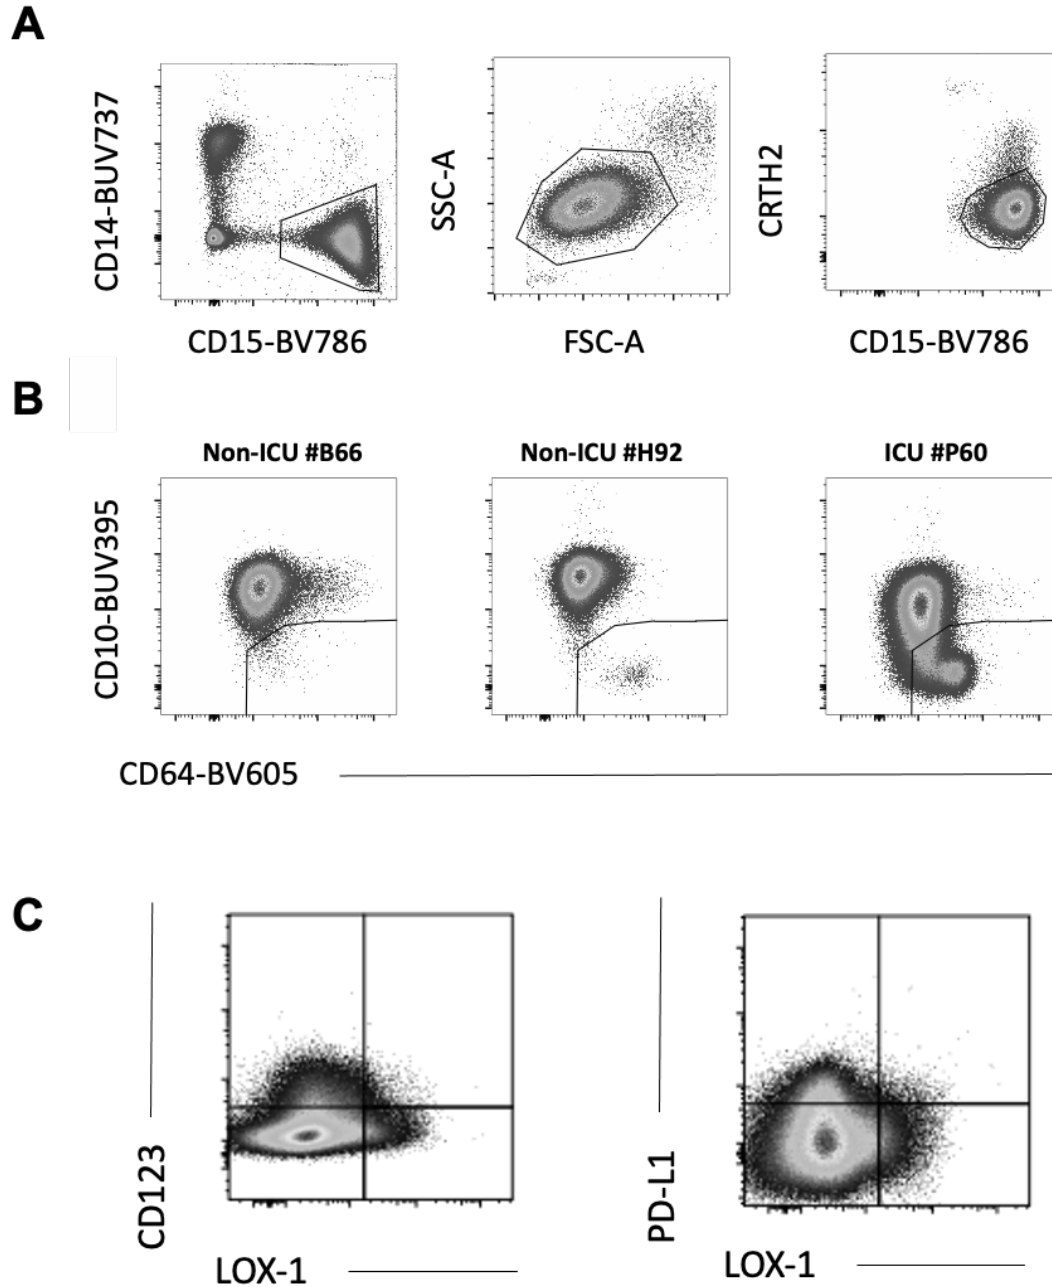

**Supplementary Figure S1: Gating strategy used for the analysis of neutrophil populations by flow cytometry.** (A) After debris and doublet exclusion, CD15<sup>+</sup>CD14<sup>-</sup> cells were selected. Eosinophils were excluded through side scatter (SSC) or forward scatter (FSC) parameters and the expression of CRTH2. The proportion of immature neutrophils was evaluated through the expression of CD10 and CD64. (B) One representative uninfected donor (#B66), COVID-19 non-ICU patient (#H92), and COVID-19 ICU patient (#60) are shown as an example. (C) Representative expression of LOX-1 and CD123 (left panel) or LOX-1 and PDL-1 (right panel) on CD10<sup>-</sup>CD64<sup>+</sup> neutrophils (#ICU-G62).

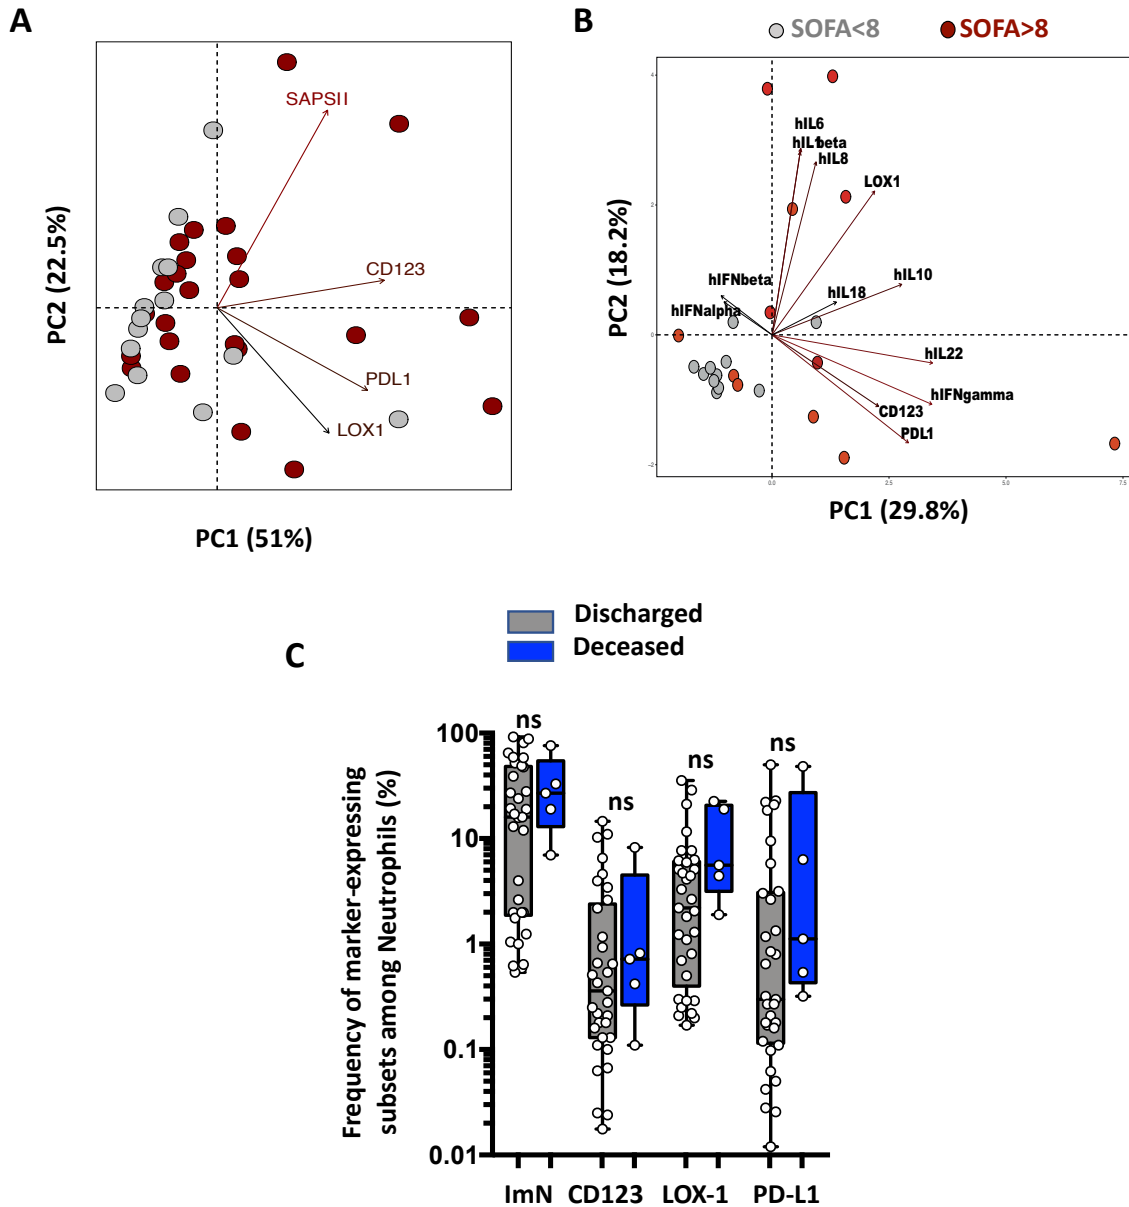

**Supplementary Figure S2: Cytokine profiles and ImN subsets abundances associated with disease severity**(A) Principal component analysis (PCA) using LOX-1+, PD-L1, CD123+, and CD10–CD64+ neutrophil abundance and Simplified Acute Physiology Score (SAPS) II variables on sample size: ICU = 24 (dark red circles) and non-ICU = 14 (gray circles). Percent contribution of each variable is indicated in color gradient black–red of the arrows. (B) PCA using serum cytokines and Sequential Organ Failure Assessment (SOFA) score variables on ICU patient sample size: high SOFA score ( $n = 11$ ) and low SOFA score ( $n = 10$ ) (SOFA < 8 = gray circles; SOFA  $\geq 8$  = red circles). (C) Box plots (min to max distribution) of the abundance of CD10–CD64+ neutrophil subsets among total neutrophils of group samples of discharged ( $n = 33$ ) and deceased ( $n = 5$ ) patients.

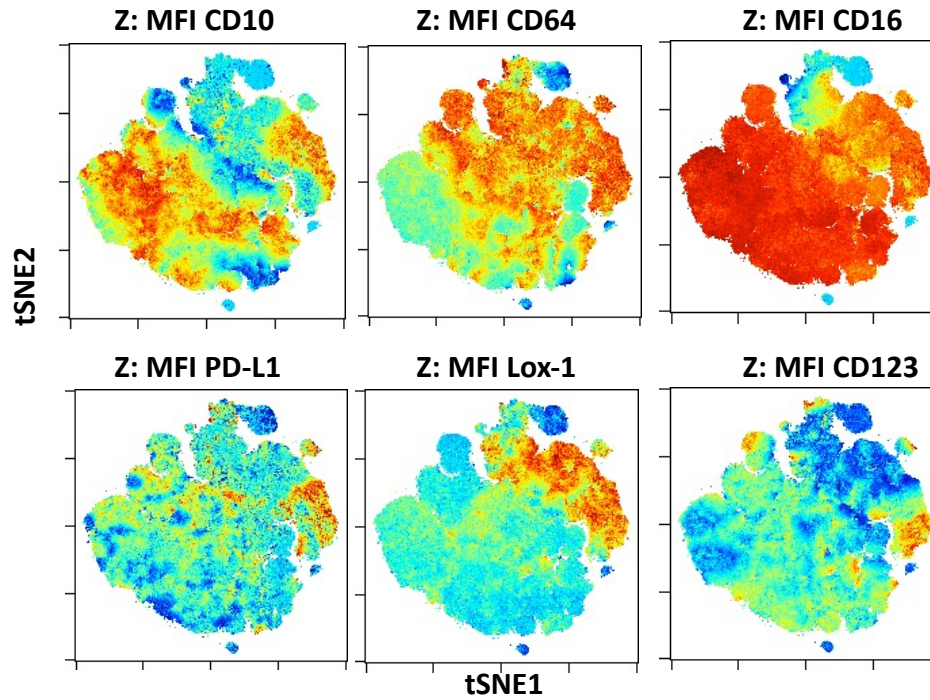

**Supplementary Figure S3: Expression of neutrophil markers on a rainbow heat scale on the Opt-SNE map of the concatenated files of all clusters.** The color gradient indicates high expression (red) to low expression (blue) of indicated Z markers.

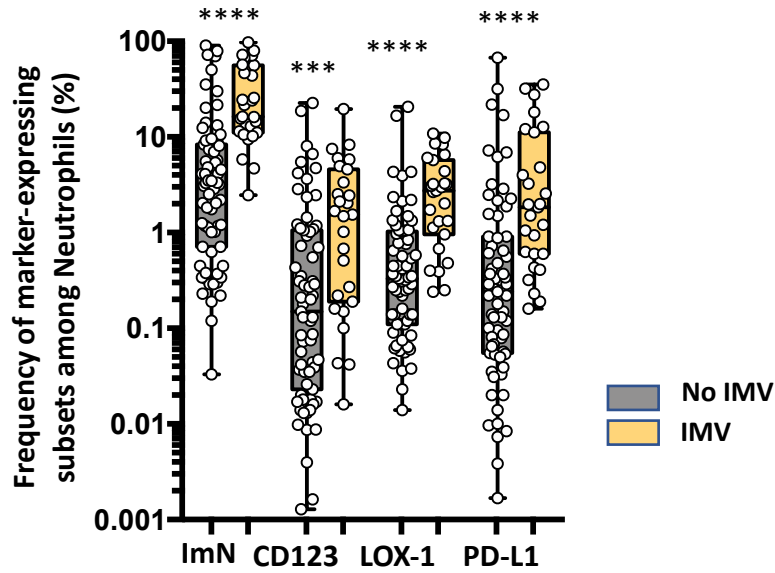

**Supplementary Figure S4: Box plots (min to max distribution) of the abundance of CD10–CD64+ neutrophil subsets among patients requiring or not requiring invasive mechanical ventilation (no IMV:  $n = 60$ ; IMV:  $n = 28$ ). Nonparametric Mann–Whitney test was used to compare differences in cellular abundance of neutrophil subsets between groups, with significance defined by a  $p$ -value of \*\*\* for  $p < 0.001$  and \*\*\*\* for  $p < 0.0001$ .**

# **LOX-1-expressing immature neutrophils identify critically-ill COVID-19 patients at risk of thrombotic complications**

Behazine Combadière,<sup>1,†,¥</sup> Lucille Adam,<sup>1,\*</sup> Noelline Guillou,<sup>1,\*</sup> Paul Quentric,<sup>1,2,\*</sup> Pierre Rosenbaum,<sup>1</sup> Karim Dorgham,<sup>1</sup> Olivia Bonduelle,<sup>1</sup> Christophe Parizot,<sup>1,2</sup> Delphine Sauce,<sup>1</sup> Julien Mayaux,<sup>3</sup> Charles-Edouard Luyt,<sup>4,5</sup> Alexandre Boissonnas,<sup>1</sup> Zahir Amoura,<sup>6</sup> Valérie Pourcher,<sup>7</sup> Makoto Miyara,<sup>1,2</sup> Guy Gorochov,<sup>1, 2,†</sup> Amélie Guihot,<sup>1,2,†</sup> and Christophe Combadière<sup>1,†, ¥</sup>

## Supplementary results

### **Demographics and baseline characteristics of ICU and non-ICU COVID-19 patients from the first wave**

The first discovery study included 38 COVID-19 patients admitted to either ICU departments or non-ICU departments. Clinical and biological characteristics of the 38 patients are shown in Table 1. The median age of the patients was 57 years (range 25–79 years), and 65.8% were male. Analysis was performed on average 8 days after the onset of symptoms (median was 8 days for the ICU patients and 13 days for the non-ICU patients). The most common past medical comorbidities were hypertension (50%), type 2 diabetes (34.2%), and obesity (36.8%). The treatment regimen at baseline was mostly antihypertensive therapy (ACE inhibitors, 26.3%; angiotensin II receptor blockers, 15.8%). Severity at baseline was assessed by the SAPS II score for all patients (median 33; range 25–78) and an additional SOFA score for ICU patients (median 8.5; range 2–17). Twenty-eight patients were assessed with CT chest imaging, which showed ground-glass opacities and/or consolidation of >50% of the lung field in 50% of all patients, and up to 81.3% of the ICU patients. Laboratory findings showed a decreased median lymphocyte count at  $0.94 \times 10^9/L$ , an increased median neutrophil count at  $7.87 \times 10^9/L$ , an increased median lactate dehydrogenase at 475.5 U/L, and an increased median D-dimer level at 2450 ng/mL. During hospitalization, eight patients received hydroxychloroquine (42.1%), while all patients received antibiotics. Oxygen therapy was administered to 100% of the patients; 87.5% of ICU patients received invasive mechanical ventilation, while 54.2% received

extracorporeal membrane oxygenation. Acute respiratory distress syndrome occurred in 55.3% of all patients (87.5% of ICU patients); acute kidney injury, in 31.2% of all patients. Among the 38 patients, 2 were diagnosed with pulmonary embolism (5.3%) and 10 (all ICU) (26.3%) were diagnosed with venous thromboembolism. As of June 8, 2020, 76.3% of all patients had been discharged, 10.5% remained in hospital, and 13.2% had died, the latter all being ICU patients.

### **Demographics and baseline characteristics of ICU and non-ICU COVID-19 patients from the second wave**

From mid-September 2020, our study included 118 COVID-19 patients admitted to either ICU departments or non-ICU departments. Clinical and biological characteristics of the 118 patients are shown in Table 2. Severity was defined according to WHO classification (<https://www.who.int/publications/i/item/clinical-management-of-covid-19>). Baseline clinical characteristics were similar to those of the first wave: median age was 61 years (range 21–78 years), with 63.6% being male, and there was a high prevalence of hypertension (52.5%), obesity (31.4%), and type 2 diabetes (30.5%). Analysis was performed on average 7 days after the onset of symptoms (7 days for the ICU patients; 5 days for the non-ICU patients). It is of note that these patients benefited from the last recommendations regarding standard of care, including corticosteroids and thromboprophylaxis, leading to an otherwise shorter duration in hospital, mostly among non-ICU patients.

# **LOX-1-expressing immature neutrophils identify critically-ill COVID-19 patients at risk of thrombotic complications**

Behazine Combadière,<sup>1,†,¥</sup> Lucille Adam,<sup>1,\*</sup> Noelline Guillou,<sup>1,\*</sup> Paul Quentric,<sup>1,2,\*</sup> Pierre Rosenbaum,<sup>1</sup> Karim Dorgham,<sup>1</sup> Olivia Bonduelle,<sup>1</sup> Christophe Parizot,<sup>1,2</sup> Delphine Sauce,<sup>1</sup> Julien Mayaux,<sup>3</sup> Charles-Edouard Luyt,<sup>4,5</sup> Alexandre Boissonnas,<sup>1</sup> Zahir Amoura,<sup>6</sup> Valérie Pourcher,<sup>7</sup> Makoto Miyara,<sup>1,2</sup> Guy Gorochov,<sup>1, 2,†</sup> Amélie Guihot,<sup>1,2,†</sup> and Christophe Combadière<sup>1,†, ¥</sup>

## **Supplementary Table S1**



## KEY RESOURCES TABLE

| REAGENT or RESOURCE                        | SOURCE            | IDENTIFIER                                                              |
|--------------------------------------------|-------------------|-------------------------------------------------------------------------|
| <b>Antibodies</b>                          |                   |                                                                         |
| CRTH2 FITC                                 | Biolegend         | #350107                                                                 |
| CD123 PE                                   | Biolegend         | #306005                                                                 |
| LOX1 BV421                                 | Biolegend         | #358609                                                                 |
| CD64 BV605                                 | Biolegend         | #305033                                                                 |
| PDL1 BV711                                 | Biolegend         | #329721                                                                 |
| CD15 BV786                                 | BD                | #741013                                                                 |
| CD14 BUV737                                | BD                | #564444                                                                 |
| CD10 BUV395                                | BD                | #565975                                                                 |
| Brillant violet buffer                     | BD                | #563794                                                                 |
| <b>Critical Commercial Assays</b>          |                   |                                                                         |
| Human CorPlex™ Cytokine Panel 7-Plex array | Quanterix         | # 85-0410                                                               |
| Simoa™ Human IL-3 Discovery Kit            | Quanterix         | #102462                                                                 |
| Simoa™ IL-17A Advantage Kit                | Quanterix         | #101599                                                                 |
| Simoa™ IL-18 Discovery Kit                 | Quanterix         | #102700                                                                 |
| Simoa™ GM-CSF Advantage Kit                | Quanterix         | #102329                                                                 |
| Simoa™ Human IFN- $\alpha$ Advantage Kit   | Quanterix         | #100860                                                                 |
| VeriKine-HS™ Human IFN Beta ELISA Kit      | PBL Assay Science | #41415                                                                  |
| <b>Software and Algorithms</b>             |                   |                                                                         |
| RStudio version 1.3.959 Mac                | Opensource        | <a href="https://rstudio.com/">https://rstudio.com/</a>                 |
| Cytobank                                   | Cytobank          | <a href="https://interm.cytobank.org/">https://interm.cytobank.org/</a> |
| Prism version 8.00                         | Graphpad          | <a href="https://www.graphpad.com/">https://www.graphpad.com/</a>       |
| SP-X Analysis Software                     | BD                | <a href="https://www.quanterix.com/">https://www.quanterix.com/</a>     |
| Simoa HD-1 Software                        | Quanterix         | <a href="https://www.flowjo.com/">https://www.flowjo.com/</a>           |
